# Supplementary material for: Constructing FePSe3–FeSe2 heterojunctions uniformly in a Ketjen black carbon matrix for superior potassium ion batteries
Source: Royal Society of Chemistry journal article supplement (doi:10.1039/d2ta07426e), 2022-01-01
Supplement: d2ta07426e1.pdf [file d2ta07426e1.pdf]

## *Supporting Information*

### **Constructing FePSe<sub>3</sub>-FeSe<sub>2</sub> heterojunctions uniformly in Ketjen Black carbon matrix for superior potassium ion batteries**

*Bi-Cui Chen<sup>1</sup>, Xian Lu<sup>1</sup>, Hou-Yang Zhong<sup>1</sup>, Pei-Wen Huang<sup>1</sup>, Ya-Nan Wu<sup>1</sup>, Si-Yu Xu<sup>1</sup>, Ke-Zhao Du,<sup>\*,1</sup> and Xiao-Hui Wu<sup>\*,1,2</sup>*

1 College of Chemistry and Materials Science, Fujian Key Laboratory of Polymer Materials, Fujian Provincial Key Laboratory of Advanced Materials Oriented Chemical Engineering, Fujian Normal University, Fuzhou 350007, China.

2 State Key Laboratory of Structural Chemistry, Fujian Institute of Research on the Structure of Matter, Chinese Academy of Sciences, Fuzhou, Fujian 350002, China.

**Table S1.** The results of ICP-OES of FePSe<sub>3</sub>-FeSe<sub>2</sub>/C composite.

| Elements | Mass percentage (%) | Molar percentage (%) | Molar ratio of<br>FePSe <sub>3</sub> and FeSe <sub>2</sub> |
|----------|---------------------|----------------------|------------------------------------------------------------|
| Fe       | 9.82                | 0.175                |                                                            |
| P        | 4.77                | 0.154                | 7.5: 1.0                                                   |
| Se       | 39.42               | 0.499                |                                                            |

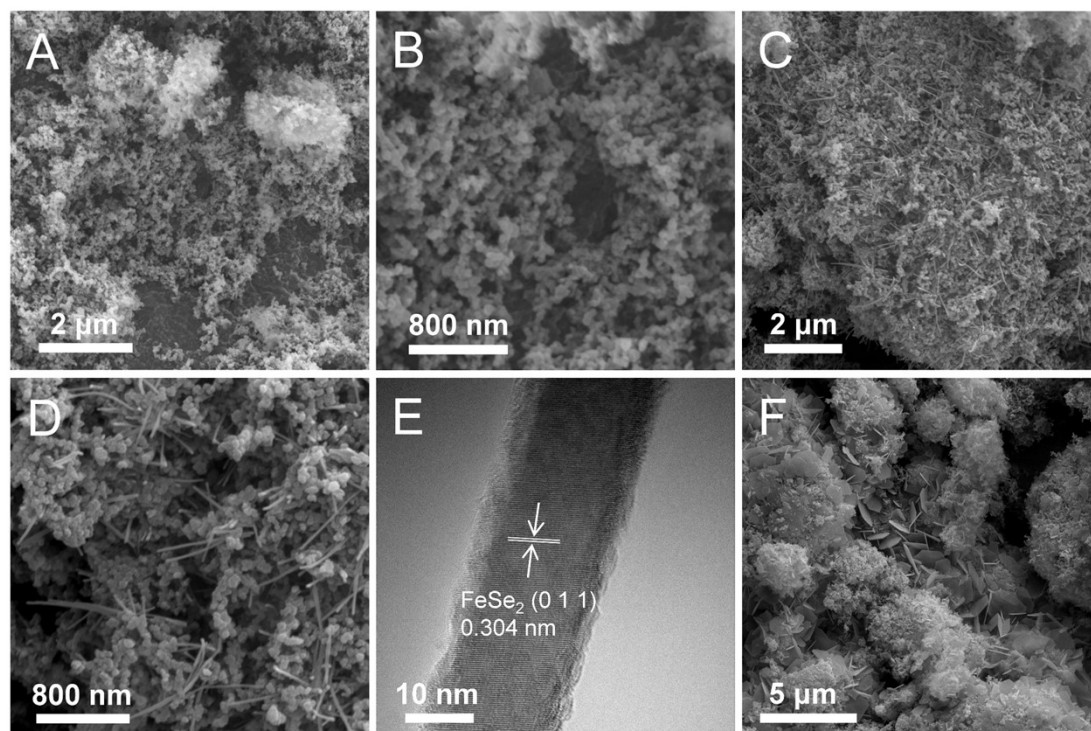

**Figure S1.** (A-B) SEM images of KB carbon. (C-D) SEM images and (E) HRTEM image of FeSe<sub>2</sub>/C. (F) SEM image of FePSe<sub>3</sub>/C.

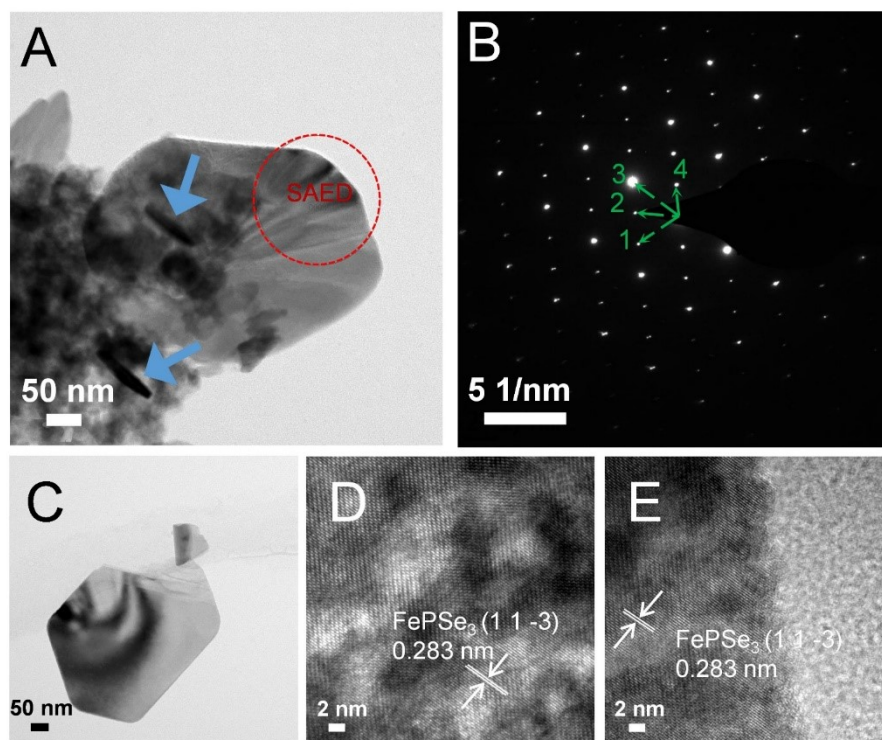

**Figure S2.** (A) TEM image, (B) SAED pattern, (C) TEM image and (D) & (E) HRTEM images of FePSe<sub>3</sub>/C. In more details, points 1-4 marked in green in the SAED pattern correspond to the (-1 -1 -6), (0 -1 -5), (1 -1 -4) and (0 0 0) planes of FePSe<sub>3</sub>, respectively.

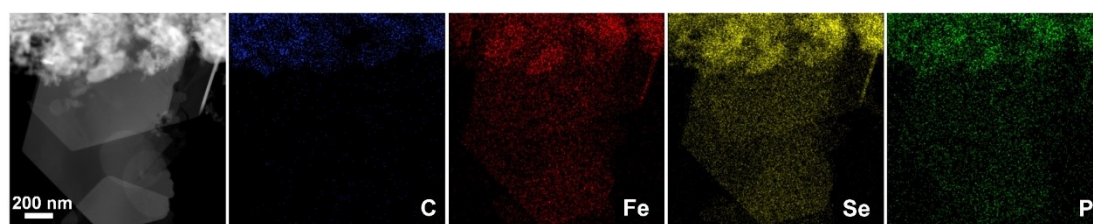

**Figure S3.** HAADF-STEM image with the corresponding EDS images of FePSe<sub>3</sub>/C.

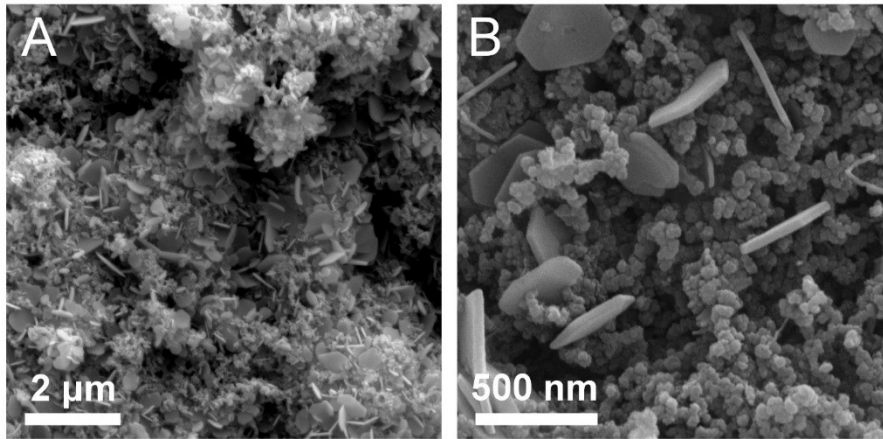

**Figure S4.** The high-resolution SEM images of FePSe<sub>3</sub>-FeSe<sub>2</sub>/C.

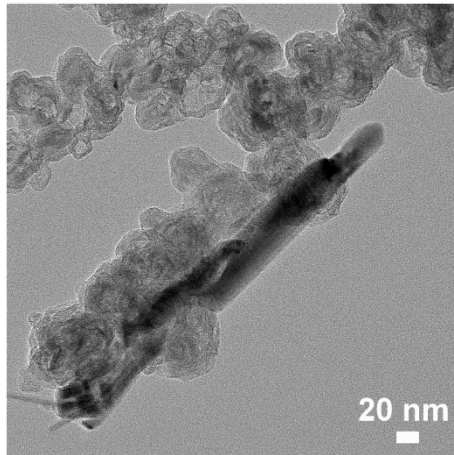

**Figure S5.** The TEM image of the side-view of FePSe<sub>3</sub>-FeSe<sub>2</sub>/C.

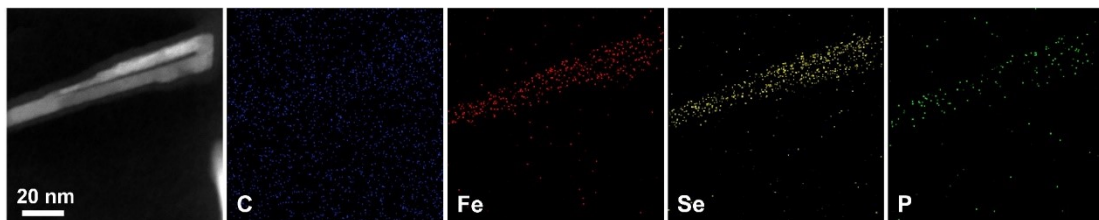

**Figure S6.** HAADF-STEM image with the corresponding EDS images of the side-view of FePSe<sub>3</sub>-FeSe<sub>2</sub>/C.

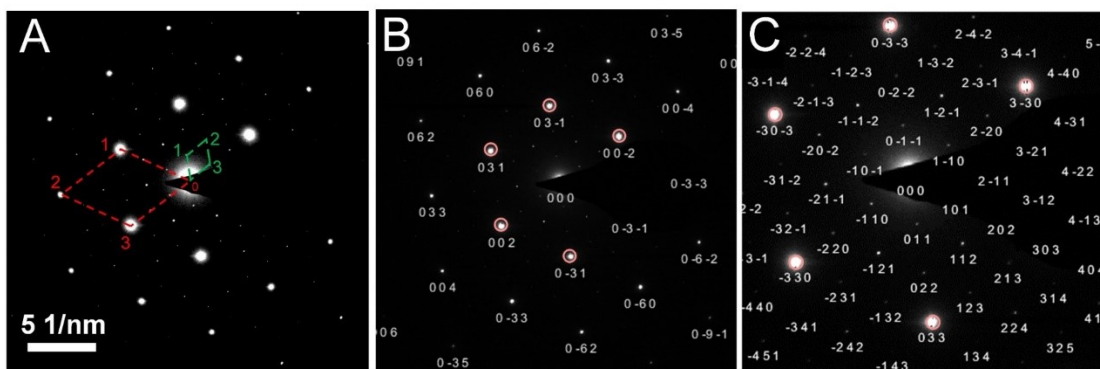

**Figure S7.** (A) SAED pattern of FePSe<sub>3</sub>-FeSe<sub>2</sub>/C. (B) The FeSe<sub>2</sub> crystal planes and (C) the FePSe<sub>3</sub> crystal planes corresponding to the diffraction spots in SAED.

This SAED pattern can be readily indexed as the 2D in-plane reflections of FePSe<sub>3</sub> with (-1 -1 1) zone axis direction and FeSe<sub>2</sub> with (1 0 0) zone axis direction. In more details, points 1-3 marked in green correspond to the (0 -1 -1), (1 -2 -1), and (1 -1 0) planes of FePSe<sub>3</sub>, respectively, and the lattice planes of FeSe<sub>2</sub> represented by the red marked dots 1-3 in turn are (0 3 1), (0 3 3), and (0 0 2), respectively.

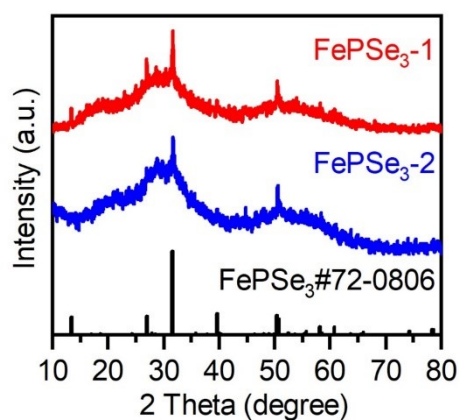

**Figure S8.** PXRD patterns of FePSe<sub>3</sub>-1 and FePSe<sub>3</sub>-2.

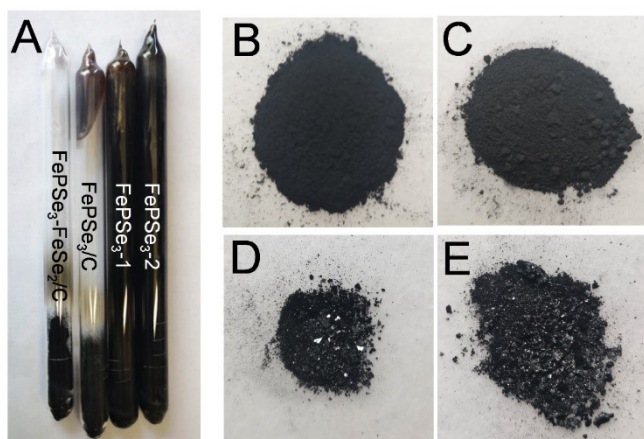

**Figure S9.** (A) The quartz tubes contain FePSe<sub>3</sub>-FeSe<sub>2</sub>/C, FePSe<sub>3</sub>/C, FePSe<sub>3</sub>-1 and FePSe<sub>3</sub>-2 products in the order from left to right. (B) FePSe<sub>3</sub>-FeSe<sub>2</sub>/C products. (C) FePSe<sub>3</sub>/C products. (D) FePSe<sub>3</sub>-1 products. (E) FePSe<sub>3</sub>-2 products.

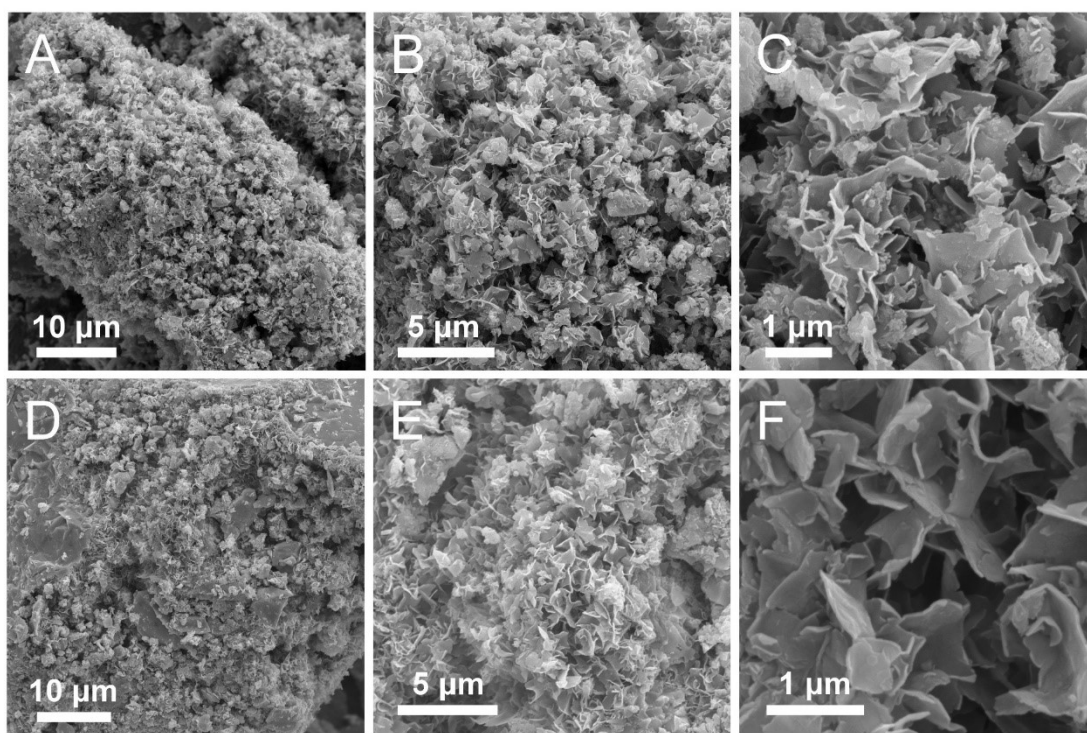

**Figure S10.** SEM images of (A-C) FePSe<sub>3</sub>-1 and (D-F) FePSe<sub>3</sub>-2.

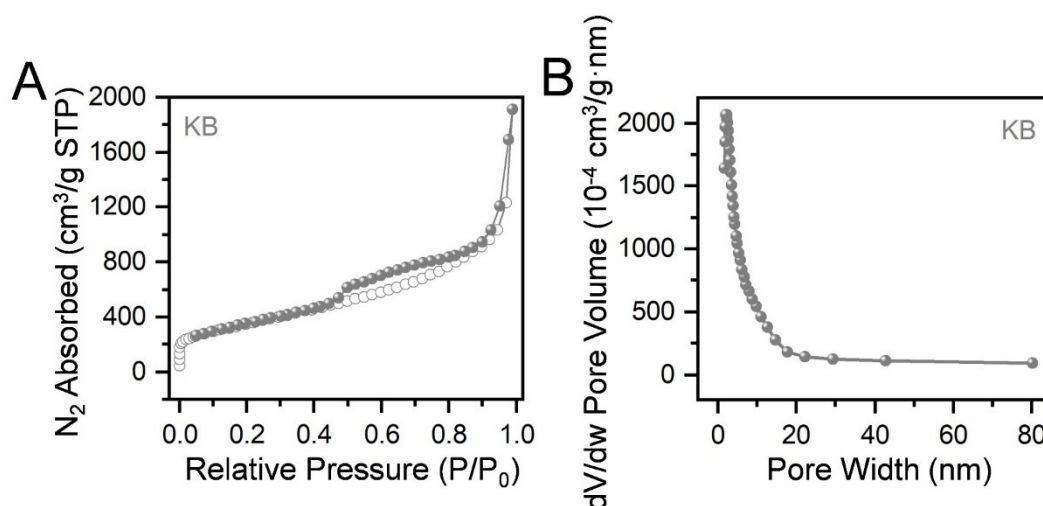

**Figure S11.** (A)  $N_2$  adsorption-desorption isotherms and (B) the corresponding pore size distribution of KB carbon.

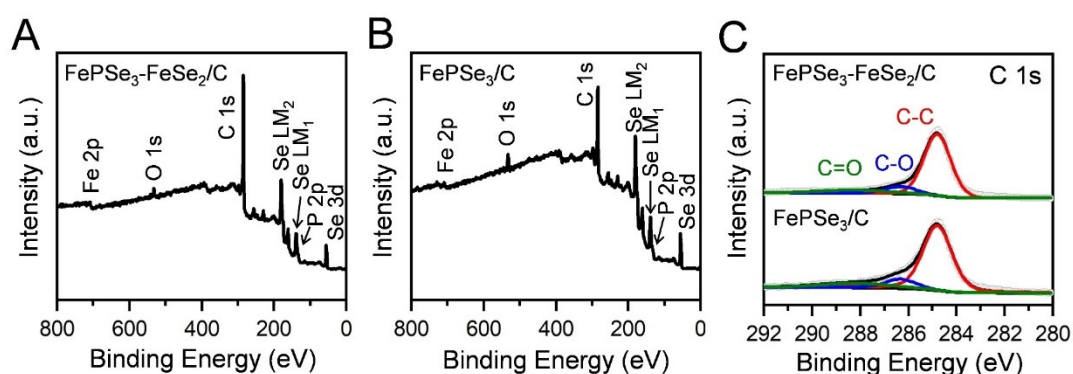

**Figure S12.** XPS survey spectra of (A)  $FePSe_3-FeSe_2/C$  and (B)  $FePSe_3/C$ . (C) High-resolution XPS C 1s spectra of  $FePSe_3-FeSe_2/C$  and  $FePSe_3/C$ .

**Table S2.** Brunauer Emmett Teller (BET) specific surface areas of KB,  $FePSe_3-FeSe_2/C$  and  $FePSe_3/C$ .

| Sample                       | KB     | $FePSe_3-FeSe_2/C$ | $FePSe_3/C$ |
|------------------------------|--------|--------------------|-------------|
| BET Surface Area ( $m^2/g$ ) | 1263.9 | 107.8              | 18.9        |

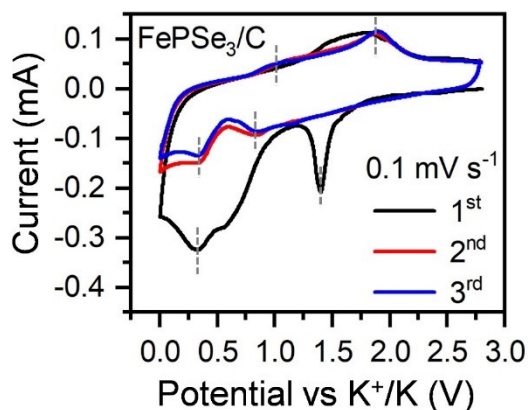

**Figure S13.** CV curves for initial three cycles of FePSe<sub>3</sub>/C electrode for PIBs at 0.1 mV s<sup>-1</sup> between 0.005 and 2.8 V.

**Table S3.** The electrochemical reactions of FePSe<sub>3</sub>-FeSe<sub>2</sub>/C and FeSe<sub>2</sub>/C with K<sup>+</sup> on anode.

| Sample                                       | Potential            | Reaction                                                     |
|----------------------------------------------|----------------------|--------------------------------------------------------------|
| FePSe <sub>3</sub> -<br>FeSe <sub>2</sub> /C | Discharged to 1.40 V | $FePSe_3 + 6K^+ + 6e^- \rightarrow Fe + P + 3K_2Se$          |
|                                              | Discharged to 1.20 V | $FeSe_2 + 4K^+ + 4e^- \rightarrow Fe + 2K_2Se$               |
|                                              | Discharged to 0.48V  | $3P + 4K^+ + 4e^- \rightarrow K_4P_3$                        |
|                                              | Charged to 1.04 V    | $2Fe + 2K_2Se \rightarrow FeSe_2 + 4K^+ + 4e^-$              |
|                                              | Charged to 1.74 V    | $K_4P_3 + 9K_2Se + 3Fe \rightarrow 3FePSe_3 + 22K^+ + 22e^-$ |
| FePSe <sub>3</sub> /C                        | Discharged to 1.40 V | $FePSe_3 + 6K^+ + 6e^- \rightarrow Fe + P + 3K_2Se$          |
|                                              | Discharged to 0.32 V | $3P + 4K^+ + 4e^- \rightarrow K_4P_3$                        |
|                                              | Charged to 1.08 V    | $K_4P_3 \rightarrow 3P + 4K^+ + 4e^-$                        |
|                                              | Charged to 1.80 V    | $Fe + P + 3K_2Se \rightarrow FePSe_3 + 6K^+ + 6e^-$          |



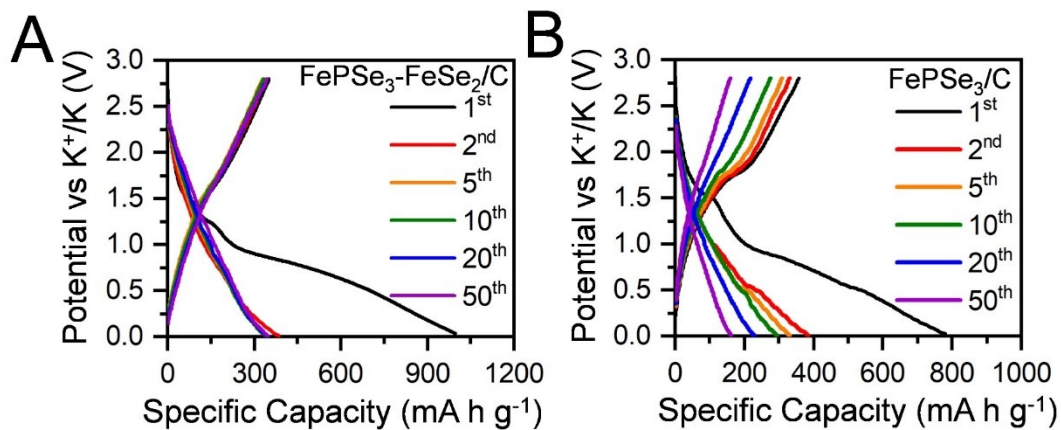

**Figure S14.** Charge–discharge profiles of (A)  $\text{FePSe}_3\text{-FeSe}_2/\text{C}$  and (B)  $\text{FePSe}_3/\text{C}$  at the current density of  $0.1 \text{ A g}^{-1}$ .

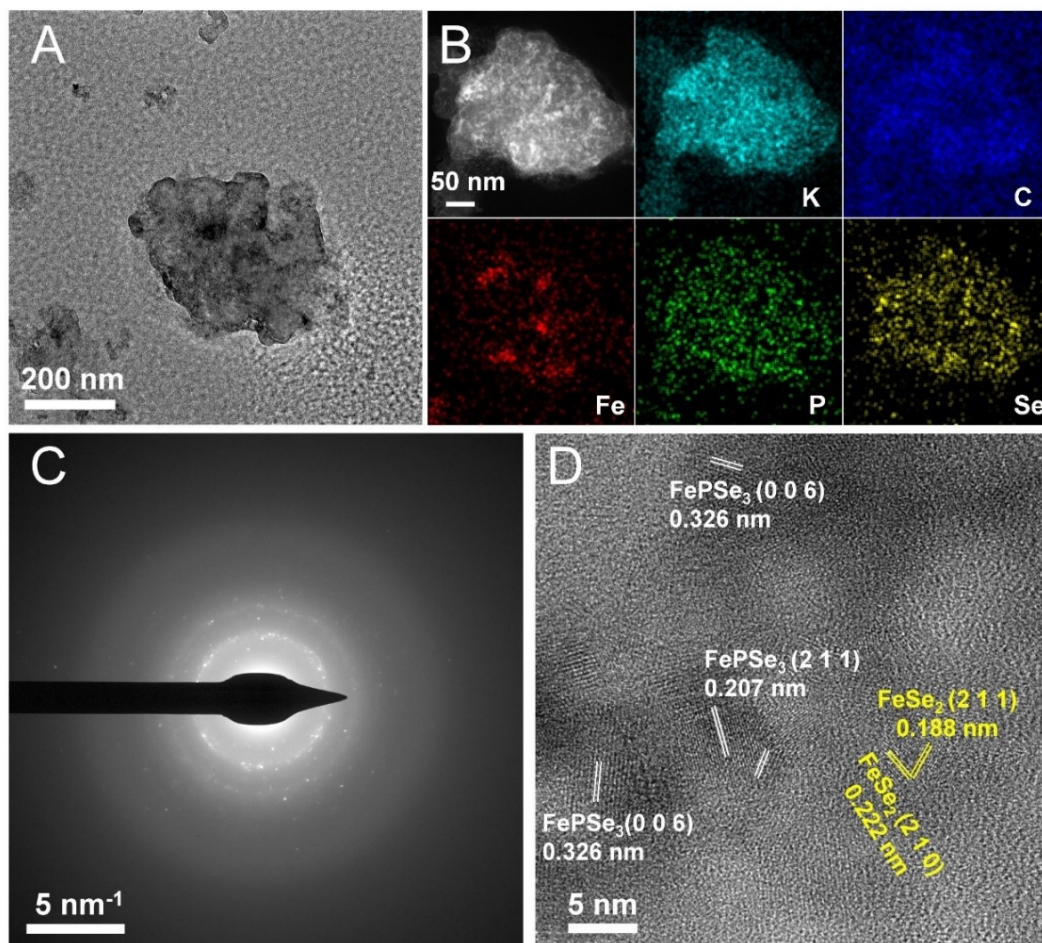

**Figure S15.** (A) TEM image, (B) HAADF-STEM image with the corresponding EDS images, (C) the SAED pattern and (D) HRTEM image of FePSe<sub>3</sub>-FeSe<sub>2</sub>/C at the current density of 0.1 A g<sup>-1</sup> after 260 cycles.

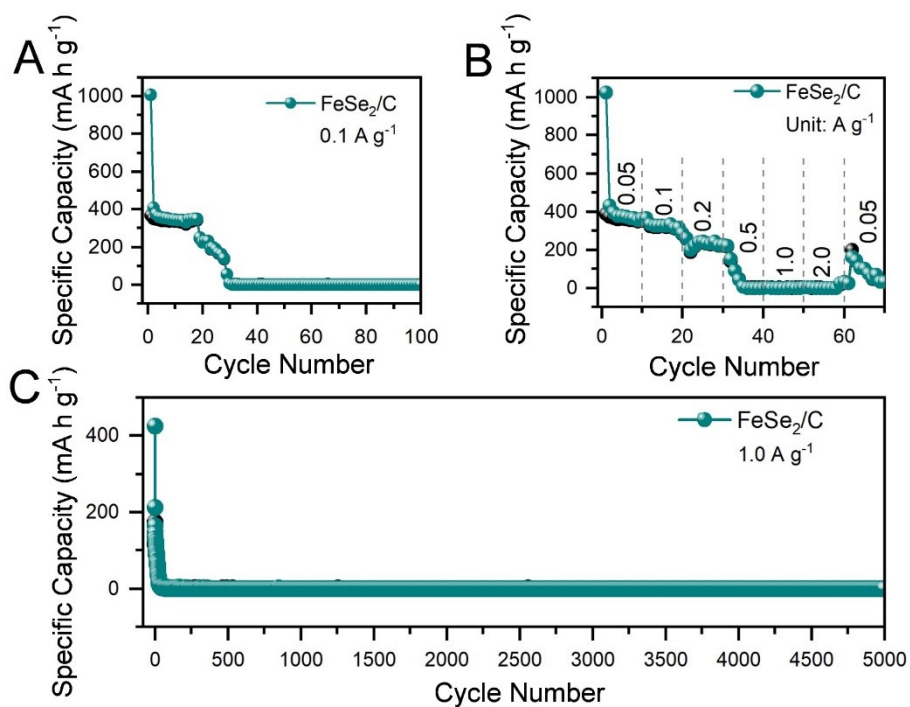

**Figure S16.** (A) Cycling performance, (B) rate performance and (C) long-term cyclic performance of FeSe<sub>2</sub>/C electrodes in the voltage range of 0.005-2.8 V.

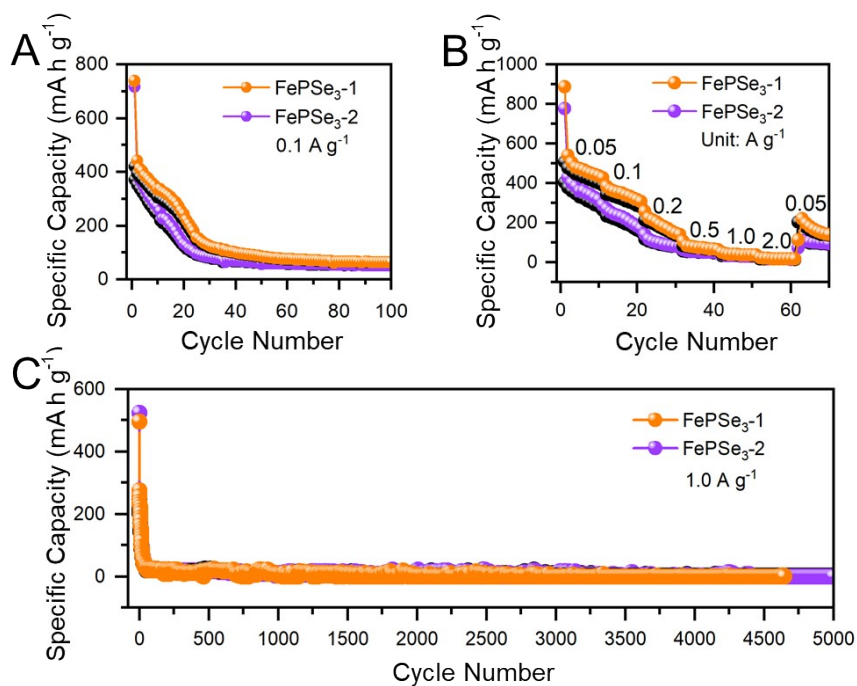

**Figure S17.** (A) Cycling performance of FePSe<sub>3</sub>-1 and FePSe<sub>3</sub>-2 electrodes at the current density of 0.1 A g<sup>-1</sup> in the range of 0.005-2.8 V. (B) Rate performance of FePSe<sub>3</sub>-1 and FePSe<sub>3</sub>-2 electrodes at various current densities from 0.05 to 2.0 A g<sup>-1</sup>. (C) Long-term cyclic performance of FePSe<sub>3</sub>-1 and FePSe<sub>3</sub>-2 electrodes at 1.0 A g<sup>-1</sup>.

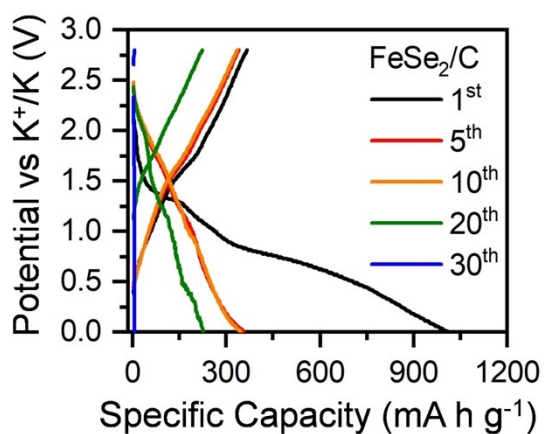

**Figure S18.** The galvanostatic charge/discharge profiles of FeSe<sub>2</sub>/C at the current density of 0.1 A g<sup>-1</sup>.

**Table S4.** Comparison of the cycling performance of FePSe<sub>3</sub>-FeSe<sub>2</sub>/C and other FeSe<sub>2</sub>-based or FePSe<sub>3</sub>-based materials for PIBs anodes.

| Material                                 | Current density (A g <sup>-1</sup> ) | Cycle number | Capacity (mA h g <sup>-1</sup> ) | Mass loading (mg cm <sup>-2</sup> ) | Calculate based on | Ref       |
|------------------------------------------|--------------------------------------|--------------|----------------------------------|-------------------------------------|--------------------|-----------|
| FePSe <sub>3</sub> -FeSe <sub>2</sub> /C | 0.1                                  | 100          | 352                              | 1.0                                 | composite          | This work |
| FeSe <sub>2</sub> /C                     | 1.0                                  | 3700         | 224                              | 0.7                                 |                    |           |
| FeSe <sub>2</sub> /NC                    | 1.0                                  | 250          | 301                              | 1.0                                 | composite          | 1         |
| FeSe <sub>2</sub> @NC                    | 0.5                                  | 100          | 280                              | 1.0-1.5                             | composite          | 2         |
| FeSe <sub>2</sub>                        | 0.4                                  | 80           | 441                              | 1.0-1.2                             | composite          | 3         |
| ZnSe-FeSe <sub>2</sub> /RGO              | 0.05                                 | 100          | 363                              | /                                   | composite          | 4         |
| FeSe <sub>2</sub> /N-C                   | 0.2                                  | 100          | 256                              | 1.0                                 | composite          | 5         |
| FeSe <sub>2</sub> @C NBs                 | 0.1                                  | 700          | 221                              | /                                   | composite          | 6         |
| f-FePSe <sub>3</sub> /CNT                | 0.5                                  | 1000         | 223                              | 0.8                                 | composite          | 7         |

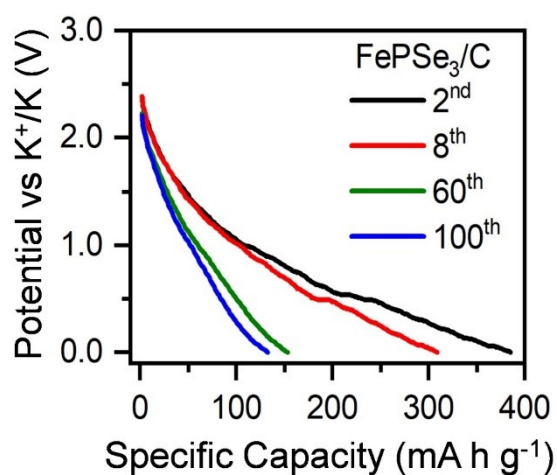

**Figure S19.** The galvanostatic discharge profiles of FePSe<sub>3</sub>/C at the 2<sup>nd</sup>, 8<sup>th</sup>, 60<sup>th</sup> and 100<sup>th</sup> cycles at 0.1 A g<sup>-1</sup> in the voltage range of 0.005-2.8 V.

**Table S5.** The specific capacities of FePSe<sub>3</sub>-FeSe<sub>2</sub>/C electrode in three voltage ranges.

|                          | 2 <sup>nd</sup> cycle                          | 8 <sup>th</sup> cycle | 60 <sup>th</sup> cycle | 100 <sup>th</sup> cycle |
|--------------------------|------------------------------------------------|-----------------------|------------------------|-------------------------|
| <b>Voltage range (V)</b> | <b>Specific capacity (mA h g<sup>-1</sup>)</b> |                       |                        |                         |
| <b>0.005-1.00</b>        | 260.2                                          | 201.6                 | 189.1                  | 179.9                   |
| <b>1.00-1.58</b>         | 73.7                                           | 72.0                  | 77.0                   | 78.7                    |
| <b>1.58-2.80</b>         | 51.9                                           | 63.6                  | 92.0                   | 93.7                    |
| <b>Full range</b>        | 385.8                                          | 337.2                 | 358.1                  | 352.3                   |

**Table S6.** The capacity increments of FePSe<sub>3</sub>-FeSe<sub>2</sub>/C electrode in three voltage ranges.

|                          | $\Delta C_{8-2}$                               | $\Delta C_{60-8}$ | $\Delta C_{100-60}$ |
|--------------------------|------------------------------------------------|-------------------|---------------------|
| <b>Voltage range (V)</b> | <b>Specific capacity (mA h g<sup>-1</sup>)</b> |                   |                     |
| <b>0.005-1.00</b>        | -58.6                                          | -12.5             | -9.2                |
| <b>1.00-1.58</b>         | -1.7                                           | 5.0               | 1.7                 |
| <b>1.58-2.80</b>         | 11.8                                           | 28.4              | 1.7                 |
| <b>Full range</b>        | -48.5                                          | 20.9              | -5.8                |

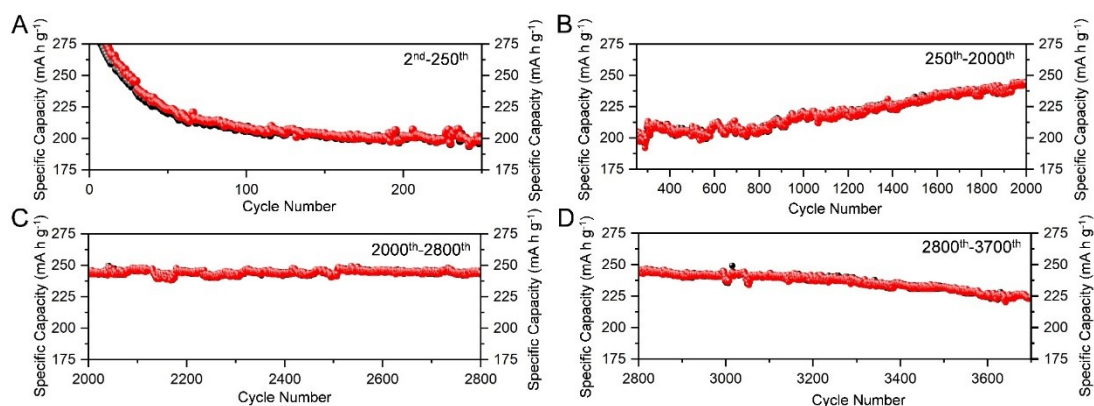

**Figure S20.** Cycling performance of FePSe<sub>3</sub>-FeSe<sub>2</sub>/C at a current density of 1.0 A g<sup>-1</sup> in different cycle intervals: (A) from the 2<sup>nd</sup> to the 250<sup>th</sup> cycle, (B) from the 250<sup>th</sup> to the 2000<sup>th</sup> cycle, (C) from the 2000<sup>th</sup> to the 2800<sup>th</sup> cycle and (D) from the 2800<sup>th</sup> to the 3700<sup>th</sup> cycle.

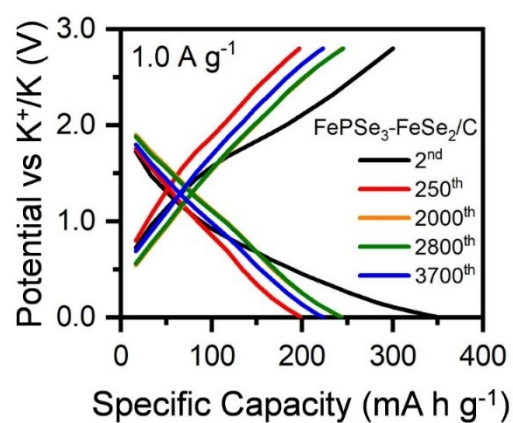

**Figure S21.** The galvanostatic charge/discharge profiles of FePSe<sub>3</sub>-FeSe<sub>2</sub>/C at the 2<sup>nd</sup>, 250<sup>th</sup>, 2000<sup>th</sup>, 2800<sup>th</sup> and 3700<sup>th</sup> cycles at 1.0 A g<sup>-1</sup> in 0.005-2.8 V.

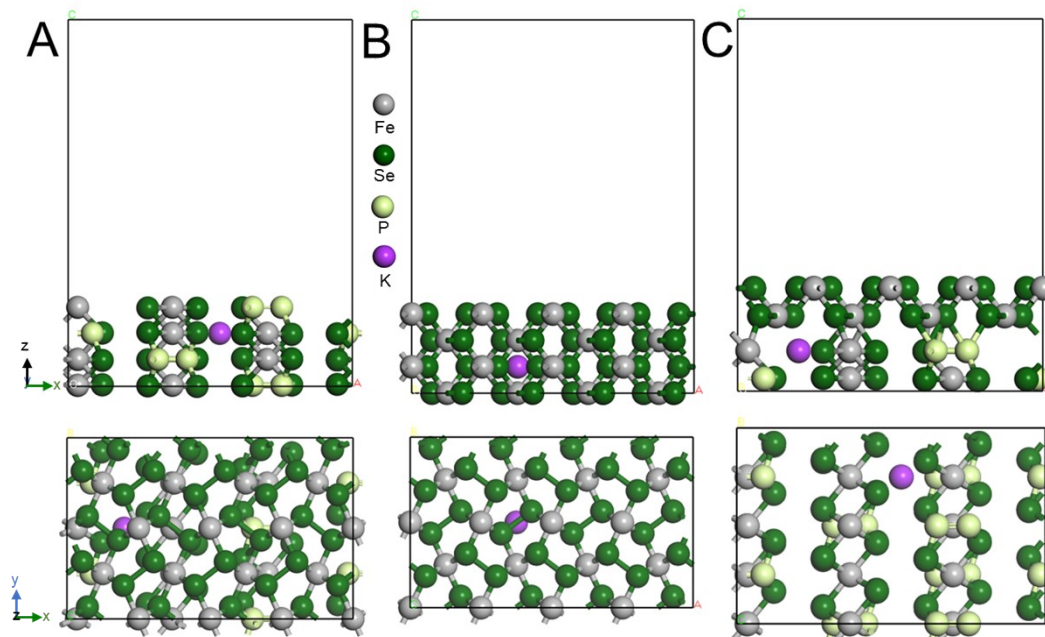

**Figure S22.** Side-view (up) and top-view (down) of built models of (A)  $\text{FePSe}_3$ , (B)  $\text{FeSe}_2$ , and (C)  $\text{FePSe}_3\text{-FeSe}_2$ .

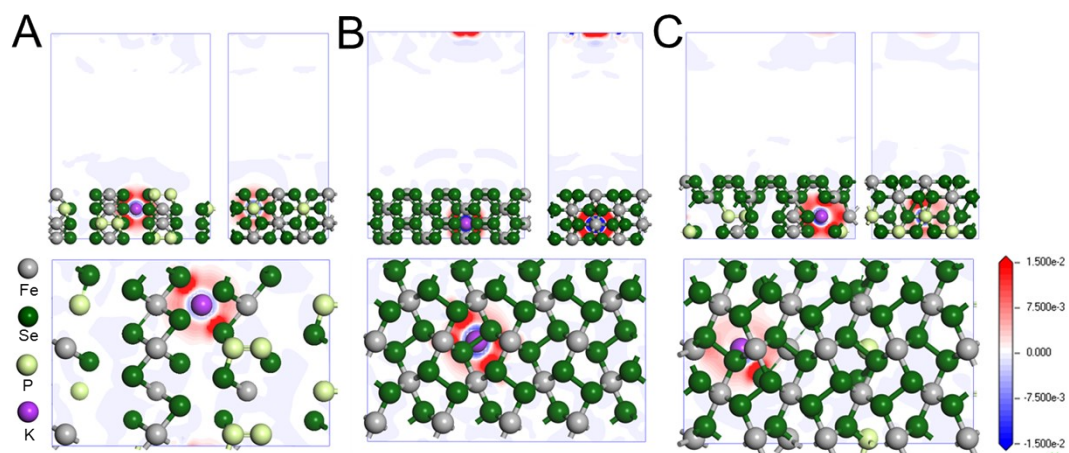

**Figure S23.** Three slices of electron density map of (A)  $\text{FePSe}_3$ , (B)  $\text{FeSe}_2$ , and (C)  $\text{FePSe}_3\text{-FeSe}_2$ .

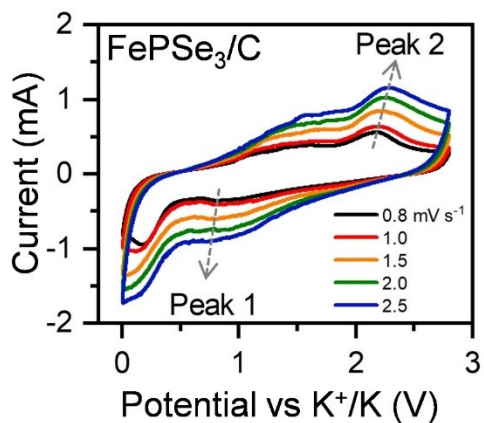

**Figure S24.** CV curves of FePSe<sub>3</sub>/C at different scan rates from 0.8 to 2.5 mV s<sup>-1</sup>.

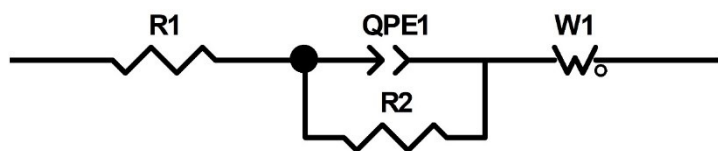

**Figure S25.** Equivalent circuit for measured EIS spectra.



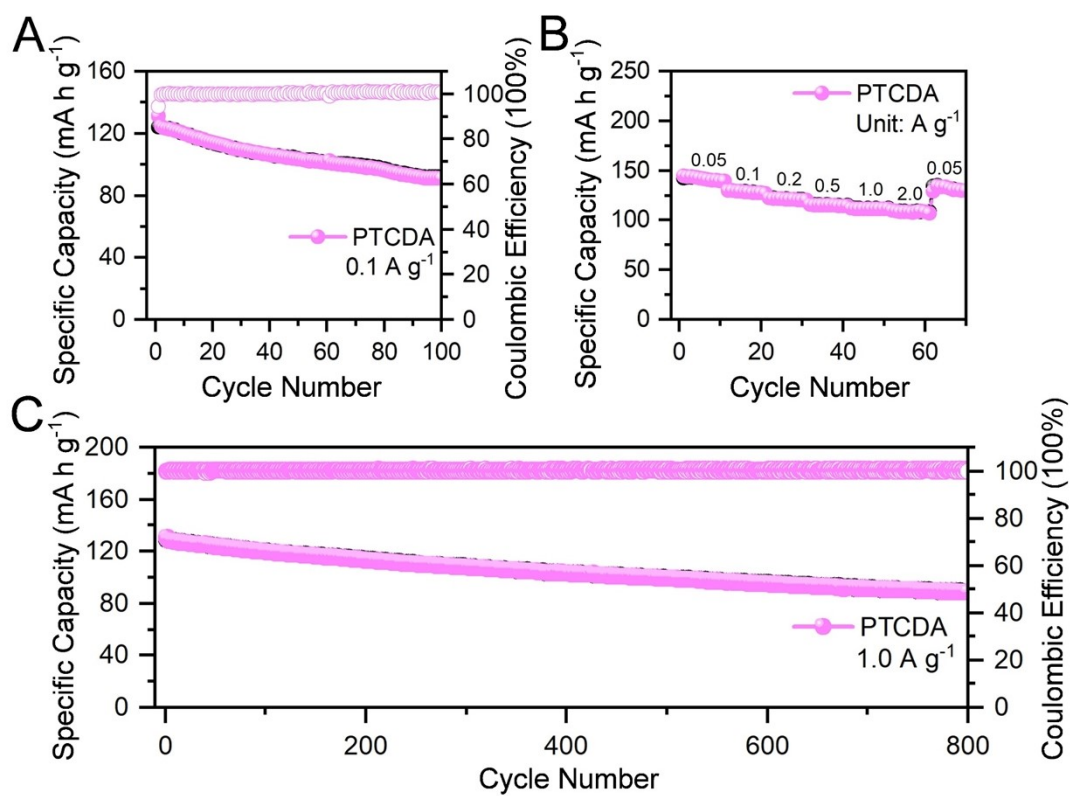

**Figure S26.** (A) Cycling performance, (B) rate performance and (C) long-term cyclic performance of PTCDA half cell in the voltage range of 1.5-3.5 V.

## References

1. Liu, Y. Z.; Yang, C. H.; Li, Y. P.; Zheng, F. H.; Li, Y. J.; Deng, Q.; Zhong, W. T.; Wang, G.; Liu, T. Z., FeSe<sub>2</sub>/nitrogen-doped carbon as anode material for Potassium-ion batteries. *Chemical Engineering Journal* **2020**, *393*, 124590.
2. Wu, H.; Lu, S.; Xu, S.; Zhao, J.; Wang, Y.; Huang, C.; Abdelkader, A.; Wang, W. A.; Xi, K.; Guo, Y.; Ding, S.; Gao, G.; Kumar, R. V., Blowing Iron Chalcogenides into Two-Dimensional Flaky Hybrids with Superior Cyclability and Rate Capability for Potassium-Ion Batteries. *ACS Nano* **2021**, *15* (2), 2506-2519.
3. Xin, W.; Chen, N.; Wei, Z.; Wang, C.; Chen, G.; Du, F., Self-Assembled FeSe<sub>2</sub> Microspheres with High-Rate Capability and Long-Term Stability as Anode Material for Sodium- and Potassium-Ion Batteries. *Chemistry* **2021**, *27* (11), 3745-3752.
4. Yuan, J.; Liu, W.; Zhang, X.; Zhang, Y.; Yang, W.; Lai, W.; Li, X.; Zhang, J.; Li, X., MOF derived ZnSe-FeSe<sub>2</sub>/RGO Nanocomposites with enhanced sodium/potassium storage. *Journal of Power Sources* **2020**, *455*, 227937.
5. Ge, J. M.; Wang, B.; Wang, J.; Zhang, Q. F.; Lu, B. G., Nature of FeSe<sub>2</sub>/N-C Anode for High Performance Potassium Ion Hybrid Capacitor. *Advanced Energy Materials* **2020**, *10* (4), 1903277.
6. Liu, C.; Li, Y. J.; Feng, Y. H.; Zhang, S.; Lu, D.; Huang, B. Y.; Peng, T.; Sun, W. W., Engineering of yolk-shelled FeSe<sub>2</sub>@nitrogen-doped carbon as advanced cathode for potassium-ion batteries. *Chinese Chemical Letters* **2021**, *32* (11), 3601-3606.
7. Huang, Y.-F.; Yang, Y.-C.; Tuan, H.-Y., Construction of strongly coupled few-layer FePSe<sub>3</sub>-CNT hybrids for high performance potassium-ion storage devices. *Chemical Engineering Journal* **2023**, *451* (4), 139013.
